# Supplementary material
Source: PubMed Central journal article supplement (PMC1964873)

**tg (37)**

**wt**

**(kDa)**

**148** —

**98** —

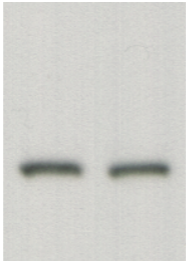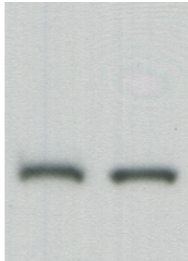

Supplement: pnas_0704774104_1.pdf [file pnas_0704774104_1.pdf]

Mean T2 value

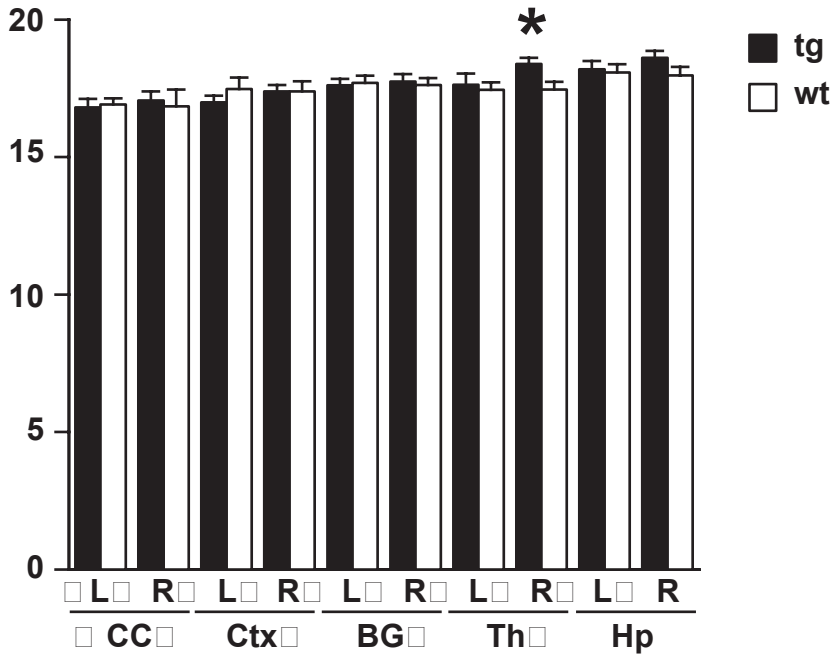

Supplement: pnas_0704774104_2.pdf [file pnas_0704774104_2.pdf]

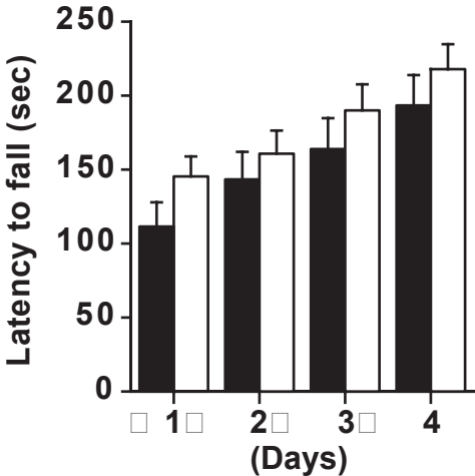

Supplement: pnas_0704774104_3.pdf [file pnas_0704774104_3.pdf]

**a**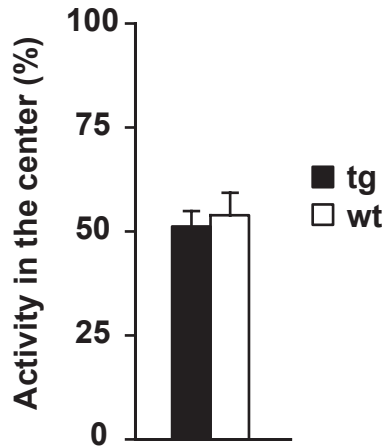**b**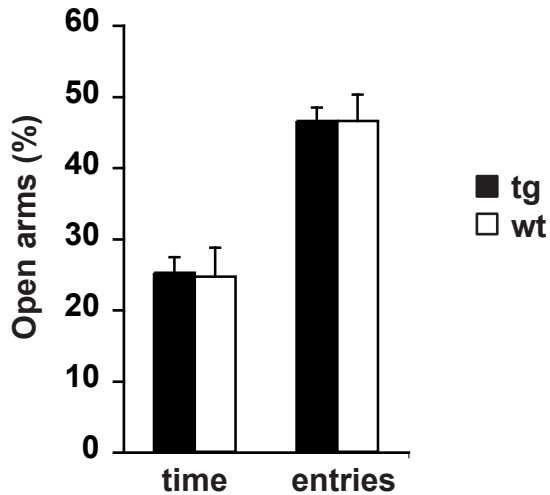

Supplement: pnas_0704774104_4.pdf [file pnas_0704774104_4.pdf]

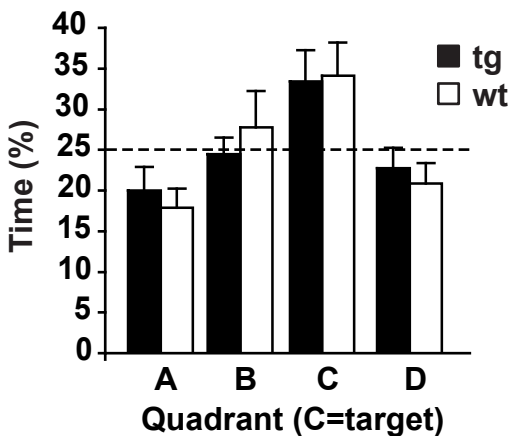

Supplement: pnas_0704774104_5.pdf [file pnas_0704774104_5.pdf]
